1        The public health co-benefits of strategies consistent  
2                with net-zero emissions: a systematic review of  
3                                quantitative studies

4  
5        *Léo Moutet,<sup>1,\*</sup>, Paquito Bernard,<sup>2</sup> Rosemary Green,<sup>3</sup> James Milner,<sup>3,4</sup> Andy Haines,<sup>3,4</sup> Rémy*  
6        *Slama<sup>5,6</sup> Laura Temime,<sup>1</sup> and Kévin Jean<sup>1,6,7</sup>*

7  
8        <sup>1</sup> MESuRS Laboratory, Conservatoire national des Arts et Métiers (Cnam), Paris, France

9        <sup>2</sup> Univ Rennes, Inserm, EHESP, Irset (Institut de Recherche en Santé, Environnement et Travail) -  
10        UMR\_S, 1085, Rennes, France

11        <sup>3</sup> Centre on Climate Change and Planetary Health, London School of Hygiene & Tropical Medicine,  
12        London WC1E 7HT, UK

13        <sup>4</sup> Department of Public Health, Environments and Society, London School of Hygiene & Tropical  
14        Medicine, London WC1H 9SH, UK

15        <sup>5</sup> Smile Team, IBENS, Inserm, École Normale Supérieure (ENS-PSL), CNRS, INSERM, Paris, France

16        <sup>6</sup> PARSEC (Paris Recherche Santé Environnement Climat), Ecole Normale Supérieure, Inserm, Paris,  
17        France

18        <sup>7</sup> Eco-Evolutionary Mathematics team, IBENS, École Normale Supérieure, CNRS, INSERM, Université  
19        Paris Science & Lettres, Paris, France

20  
21        \* Author to whom any correspondence should be addressed. Email: [leo.moutet@gmail.com](mailto:leo.moutet@gmail.com)

## 22 ABSTRACT

23 Moving toward net-zero emission societies is projected to provide health co-benefits, yet their  
24 magnitude is not well documented and may be context-specific. Synthesizing the evidence on these  
25 co-benefits could enhance the engagement of decision-makers and populations in climate mitigation  
26 actions. We performed a systematic review including 58 quantitative studies exploring 125 scenarios.  
27 Across air quality, physical activity and dietary changes pathways, substantial health co-benefits were  
28 found, with half of scenarios showing a mortality reduction by more than 1.5%, in addition to  
29 benefits directly related to climate stabilization. However, these co-benefits varied with explored  
30 emission sectors, decarbonization levers, modelling approaches and locations. Among studies  
31 including a cost-benefit analysis, 11 of 13 estimated that monetized benefits outweighed the costs of  
32 implementing climate policies. This review highlights the need for a standardised framework to  
33 assess and compare health impacts of climate mitigation actions across sectors, and confirms that  
34 achieving net-zero goals supports far-reaching public health policies.

35 **Keywords:** Health impact assessment, Net-zero emission pathways, Systematic review, health co-  
36 benefits of climate policies, climate change mitigation

## 37 INTRODUCTION

38 In 2016, 196 governments signed the Paris agreement that aims to reduce anthropogenic  
39 greenhouse gas (GHG) emissions to net-zero by mid-century to limit global warming well below 2°C  
40 above preindustrial levels.<sup>1</sup> Resulting nationwide commitments, identified as Nationally Determined  
41 Contributions (NDCs), fall short of addressing these objectives and a majority of currently  
42 implemented policies do not achieve pledged contributions.<sup>2,3</sup> Beyond NDCs, various governmental  
43 or non-governmental organizations have been developing roadmaps that outline technical and  
44 political solutions for society to attain net-zero emissions (i.e. GHG emissions reduced to the lowest  
45 possible level with remaining emissions being offset by natural or artificial carbon sinks). These  
46 strategies activate different levers, such as technological innovation improving energy efficiency and  
47 allowing decarbonized energy production; or political, fiscal and behavioural instruments, reducing  
48 the use of energy and materials, often referred to as demand-side policies.

49 Many climate mitigation policies are likely to also benefit human health by directly and indirectly  
50 targeting modifiable environmental and behavioural risks, such as air pollution or diet.<sup>2,4</sup> Several  
51 studies have assessed the health co-benefits arising from either single climate mitigation actions or  
52 regional or national multi-sectoral climate policies.<sup>5,6</sup> Recently, the Lancet Pathfinder initiative  
53 produced an umbrella review exploring the health co-benefits of a wide range of specific GHG  
54 mitigation actions.<sup>4</sup> As yet, no systematic review has explored the health impact of combinations of  
55 actions aimed at achieving net-zero emissions.

56 Such an appraisal could provide valuable insights for identifying specific health pathways, sectors of  
57 activity or levers of decarbonization that are likely to optimize the co-benefits of climate mitigation  
58 actions. Summarizing the existing evidence regarding the health co-benefits of pathways to net-zero  
59 GHG emissions is also key to increasing the commitment of people and their governments to climate  
60 actions in a context where implemented or pledged policies fall short of the goals of the Paris  
61 Agreement.<sup>7,8</sup>

62 Here, we systematically reviewed the current evidence regarding the health co-benefits of  
63 prospective net-zero GHG emission scenarios (thereafter “net-zero scenarios”). We compare the  
64 predicted health co-benefits across published health impact assessment (HIA) studies, accounting for  
65 various sectors of activity and co-benefit pathways. We also identify the main gaps in knowledge,  
66 needs for future research, and provide some recommendations for health impact assessments of  
67 prospective net-zero emission scenarios.

## 68 METHODS

69 We conducted a systematic review, following the Preferred Reporting Items for Systematic Review  
70 and Meta-analysis (PRISMA) 2020 guidelines<sup>9</sup>. The PRISMA checklist is available as Table S1. The  
71 study protocol was registered in PROSPERO (ID: CRD42023429759).

### 72 Search strategy

73 We searched three literature databases for studies published prior to January 2024: PubMed, Web of  
74 Science and Scopus. The search query included two mandatory terms, referring to health or mortality  
75 on the one side; and to net-zero emissions targets or limited climate change on the other. The  
76 detailed strategy is available in Table S2.

### 77 Selection criteria and screening

78 Studies were screened by two independent reviewers (LM and KJ) using the Covidence management  
79 tool.<sup>10</sup> A third researcher (LT) resolved any conflicts.

80 Screening was first carried out based on titles and abstracts (step 1), from which only original  
81 research pieces were included. At this stage, we only included studies explicitly referring to a GHG  
82 emission objective and assessing quantitative health outcomes or an economic valuation of health  
83 impacts. Qualitative studies, reviews, meta-analyses or opinion pieces were excluded although we  
84 screened meta-analyses and reviews for potential studies to include.

85 In the full-text assessment (step 2), we included studies which: 1) relied on a prospective scenario  
86 that included socio-economic and/or technical choices sufficient to attain net-zero GHG emissions or  
87 meet Paris agreement objectives (a climate warming limited to 1.5 °C or failing that to well under 2  
88 °C); 2) provided quantitative estimates of health impacts or economic assessments of such benefits;  
89 and 3) explored at least one health co-benefit pathway of mitigation actions. The studies were not  
90 required to assess all health pathways that would be affected by the emission sectors considered in  
91 the overall prospective scenario.

92 Co-benefits pathways were defined here as climate mitigation actions that improve human health by  
93 pathways, unmediated by climate. They included, but were not *a priori* limited to, air quality  
94 improvement, enhanced active transport and healthy dietary patterns. We considered the mitigation  
95 of extreme heat or extreme climatic events as a direct benefit of climate mitigation policies; and  
96 therefore excluded them from quantitative analyses.

### 97 Data extraction

98 For all included articles, two authors (LM and PB) independently extracted information on the  
99 following characteristics: time and geographical scale, emission sector(s) considered (power  
100 generation, transportation, agriculture), explored co-benefits pathways (e.g. diet, physical activity, air  
101 pollution...) and assessed health outcome metrics (number of deaths prevented, life-years gained...).  
102 When available, the disaggregated impacts estimated across different sectors or pathways were  
103 extracted. We also retrieved characteristics regarding the modelling methods: demographic  
104 hypothesis, models of exposure, health impact assessment approach, and exposure-response  
105 function applied.

106 For each study (and each scenario assessed when the study assessed several), we categorized net-  
107 zero scenarios based on the major lever of mitigation assumed, using the following in-house

108 categorisation: energy decarbonization, demand reduction, health in climate policies, financial  
109 instrument. Baseline scenarios were also categorized based on their assumptions regarding evolution  
110 of GHG emissions or utilization of a reference year (Figure S1).

### 111 **Confidence assessment**

112 Since there is no validated tool to assess methodological bias in health impact assessment studies,  
113 we referred to guidelines reported by Hess et al for modelling and reporting health effects of climate  
114 change mitigation actions.<sup>11</sup> Among 36 modelling and/or reporting criteria suggested by Hess et al,  
115 we retrieved those relevant to our study context and merged them into major topics, ending up with  
116 13 final criteria (see table S3 for details).

### 117 **Health impacts scaling**

118 In order to compare health impacts across studies, we retrieved and scaled estimates of the number  
119 of deaths prevented and/or life-years gained. When only life-years gained were estimated and if the  
120 region of investigation was available in the Global Burden of Disease 2021, they were converted into  
121 premature deaths prevented.<sup>12</sup> The scaled outcome analysed was the preventable mortality fraction,  
122 estimated based on the ratio between the number of deaths prevented by a scenario relative to a  
123 baseline and the number of deaths projected for the associated location, time and age range. More  
124 details on the scaling calculations are provided in supplementary text 1. Analyses were conducted  
125 using R and are available at: [https://github.com/LeoMoutet/revue\\_syst](https://github.com/LeoMoutet/revue_syst).

126 RESULTS

127 Descriptive findings

128 Figure 1. Flow-chart of study selection

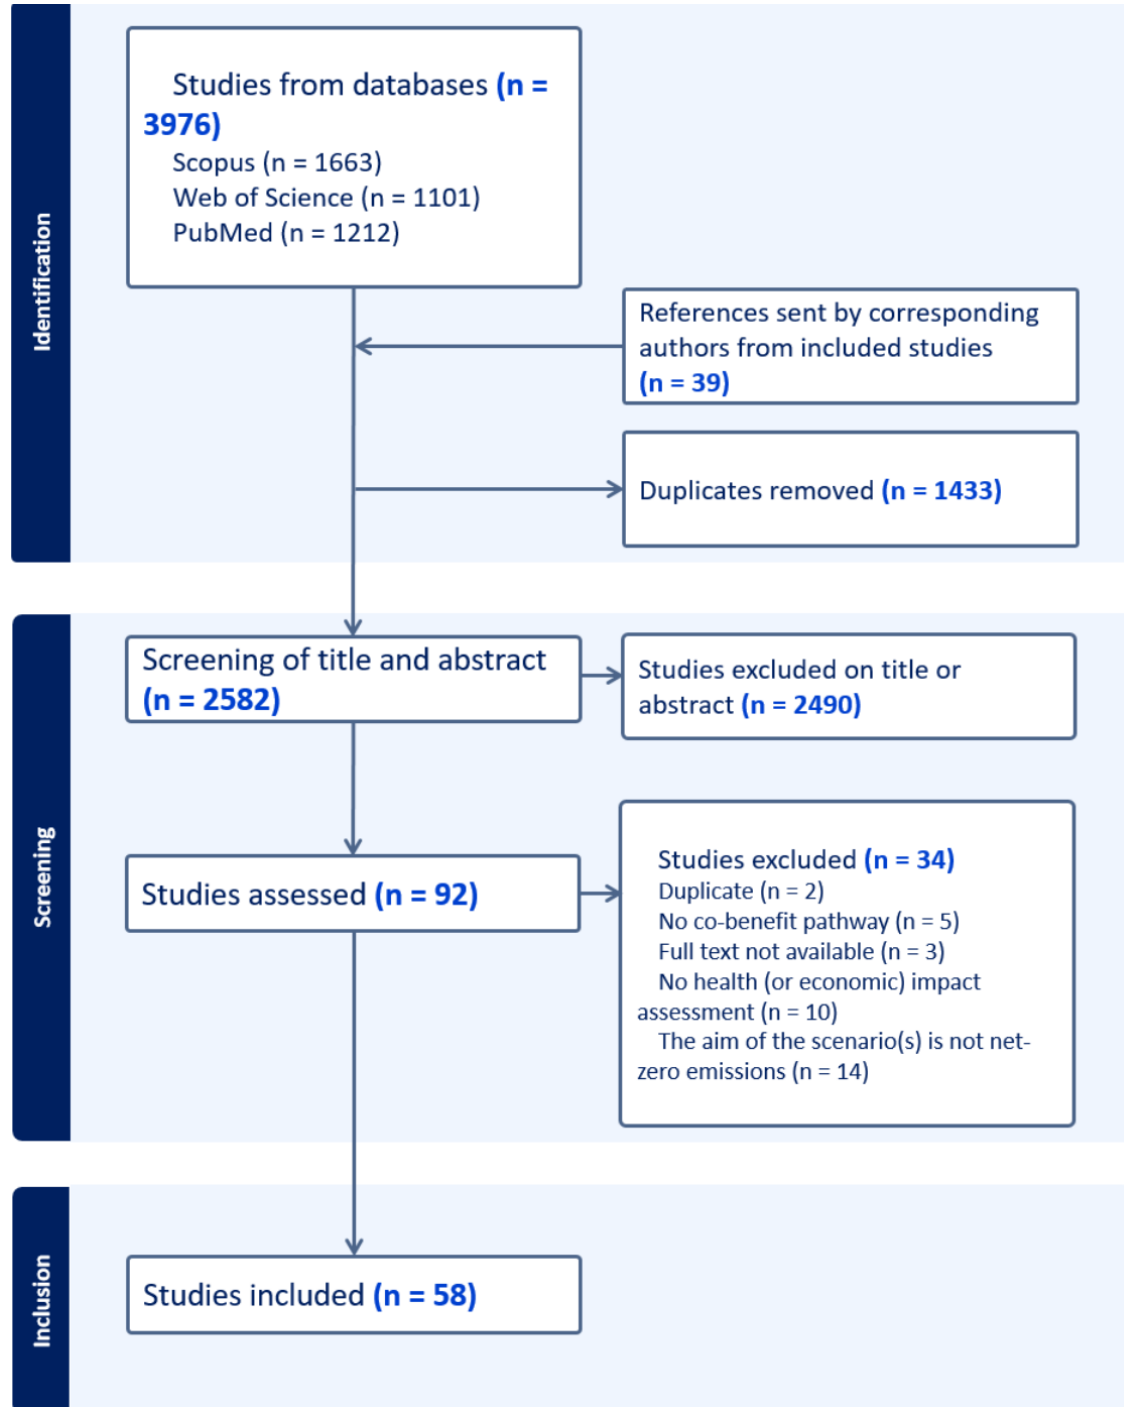

130 We identified 3,976 records from the three databases, of which 1,433 duplicates were removed  
131 (Figure 1). Of the 2,582 abstracts screened (step 1), 92 qualified for full-text screening. In the full-text  
132 assessment (step 2), 34 studies were excluded, mainly because they did not estimate quantitative  
133 health metrics (n=10) or because they were not explicitly based on net-zero scenarios (n=14). All  
134 corresponding authors from included studies were contacted in December 2023 to request potential  
135 relevant unidentified peer-reviewed studies, resulting in the inclusion of two additional studies.  
136 Eventually, 58 studies met our inclusion criteria.

137 In addition to 12 worldwide studies,<sup>13–24</sup> eight were conducted on a multinational scale (Figure 2)  
138 involving from two to 139 countries<sup>5,6,25–30</sup>, and 25 on single countries. These national assessments  
139 focused on north-east Asia,<sup>31–48</sup> Europe,<sup>49–52</sup> India<sup>53,54</sup> or the USA<sup>55</sup> and 13 sub-national studies  
140 conducted in east-China,<sup>56–61</sup> Europe,<sup>62,63</sup> California (USA),<sup>64–66</sup> Virginia (USA),<sup>67</sup> and Santiago de  
141 Chile.<sup>68</sup>

142

143 **Figure 2. Geographical distribution of studies included.** *Worldwide studies (n=12) are not*  
144 *represented on the map.*

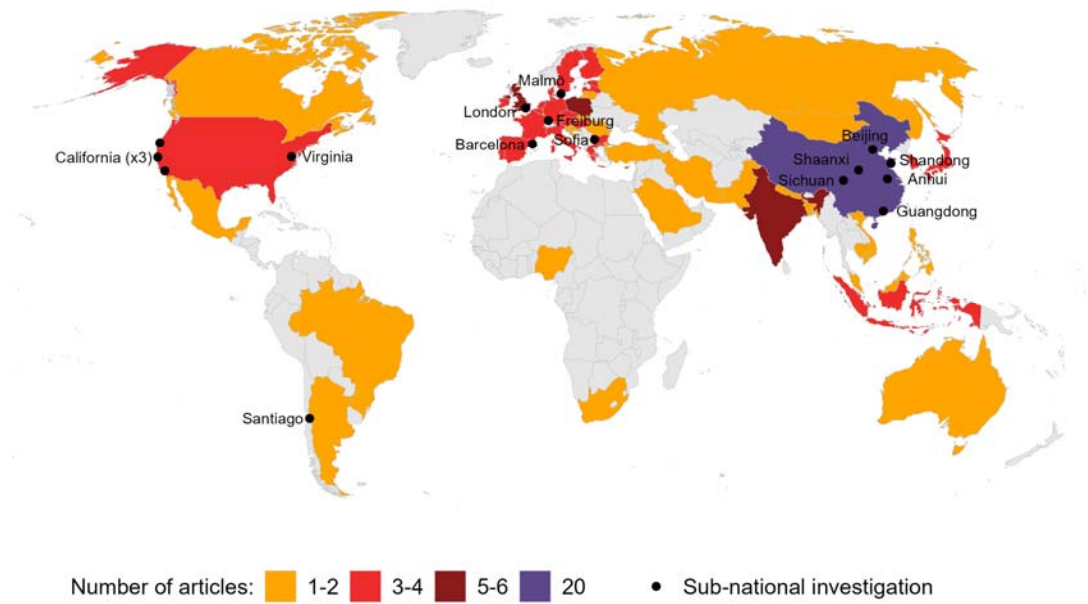

145

146 The main characteristics of included studies are described in Figure 3. The majority (91%) of the  
147 included papers were published since 2018 (Figure 3A).

148

149 **Figure 3. Descriptive analysis of included studies, by publication year (A), type of scenario (B),**  
150 **emission sector (C) and co-benefit pathway studied (D).**

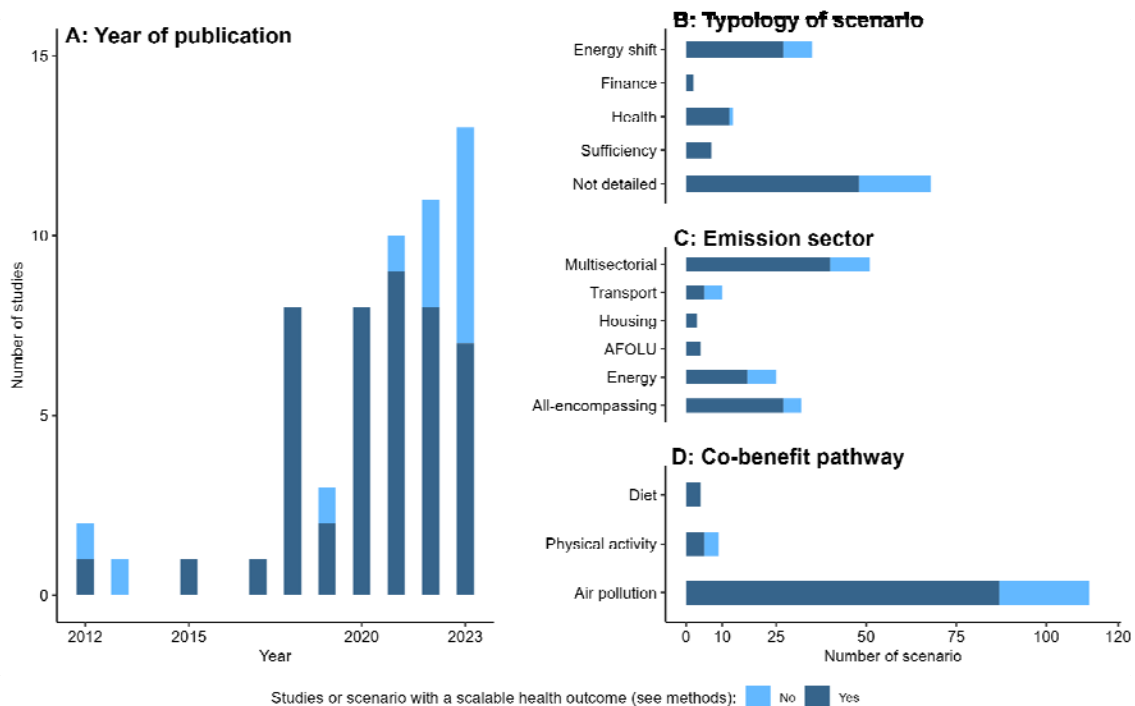

151

### 152 Net-zero emission scenarios

153 14 studies assessed comprehensive scenarios from external prospective net-zero emission plans, i.e.  
154 developed by a governmental or non-governmental institution. Ten studies based their scenarios on  
155 official NDCs and 20 studies relied on the temperature target from the Paris agreement to estimate  
156 subsequent GHG emissions and air pollution projections. For 14 studies, the authors developed an in-  
157 house scenario (e.g. Net-zero CO<sub>2</sub> emission target year for each G20 countries) to assess the impacts of  
158 various specific measures (more details in supplementary text 2).

159 Out of 125 scenarios, 58 provided specific details on the projected levers to achieve net-zero  
160 emissions (Figure 3B). The main policy lever identified was decarbonization of the energy sector  
161 through the scale-up of technologies such as carbon capture and storage, renewable energy,  
162 electrification or development of nuclear energy production. Some scenarios aimed specifically at the  
163 improvement of human health in a “health in all policies” approach, most commonly by improving air  
164 quality.<sup>5,18,19,21,27,29,38,53,57,62,66,68</sup> A few scenarios relied on demand-side interventions (e.g. decreased  
165 energy or transport demand, n=7)<sup>6,17,31,35,47,52,56</sup> or financial instruments (e.g. carbon taxes or prices of  
166 parking, n=4)<sup>16,53,62,66</sup>, projected to induce various behavioural shifts (Figure S1).

### 167 Emission sectors and co-benefit pathways considered

168 Heterogenous combinations of emission sectors and co-benefits pathways were explored (Figure 4).



169 The emission sectors most frequently studied were energy (n=40), transport (n=27), industry (n=21),  
170 housing (n=15) and Agriculture, Forestry and Other Land Use (AFOLU) (n=13) (Figure 3C). A majority  
171 (n=23) of the studies were multi-sectoral and 14 studies modelled global anthropogenic emissions,  
172 with some studies including natural emissions (such as vegetation fire, dust, sea sprays, biogenic  
173 volatile organic compounds...). These models do not incorporate any specific changes in natural  
174 emissions based on the scenarios. The vast majority of studies (n=56) assessed health impacts  
175 related to air quality, including fine particulate matter or PM<sub>2.5</sub> (n=53), O<sub>3</sub> (n=22), SO<sub>2</sub> (n=4), NO<sub>x</sub>  
176 (n=3), NO<sub>2</sub> (n=4), and PM<sub>10</sub> (n=3); five of these included household exposures to PM<sub>2.5</sub> (n=5), radon  
177 and tobacco smoke (n=2), O<sub>3</sub> (n=1), increased winter temperature attributable to home energy  
178 efficiency (n=1) and mould (n=1). Out of the studies including PM<sub>2.5</sub>, 17 considered specifically black  
179 carbon. Six scenarios investigated physical activity enhanced by active transport, while five scenarios  
180 examined dietary changes, with notably a reduction in red meat consumption (Figure 3D). Two  
181 studies combined air pollution, diet and physical activity,<sup>5,6</sup> two studies focused exclusively on  
182 physical activity<sup>52,62</sup> and one on household air temperature and air quality (PM<sub>2.5</sub>, radon, tobacco  
183 smoke and mould).<sup>63</sup>  
184

185 **Figure 4. Linkage between typology of scenario, sector of emission, co-benefit pathway and health**  
186 **outcome across net-zero scenarios.** Each scenario can have links to several emissions sectors,  
187 *exposition and outcome.* AFOLU: Agriculture, Forestry and Other Land Use.

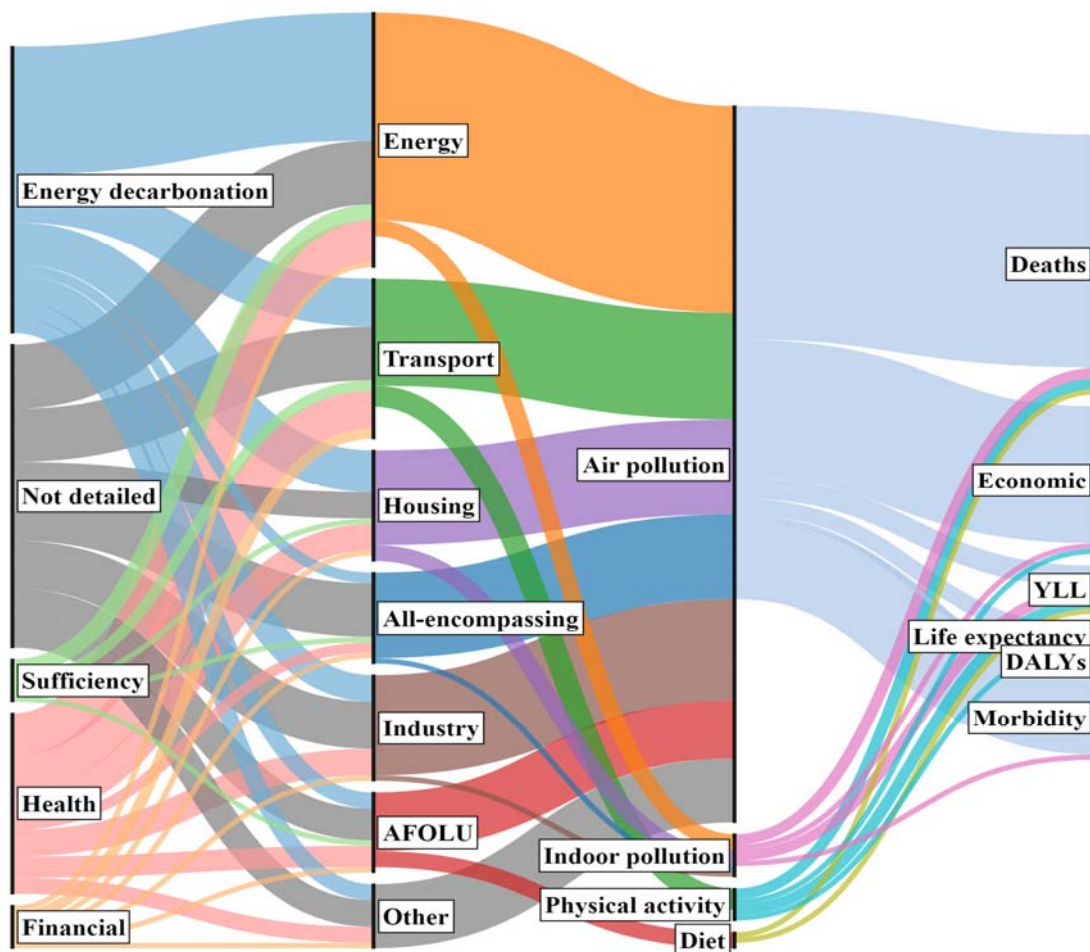

188

189 **Methods used**

190 Various health outcomes were quantified in the studies selected: 46 estimated the number of  
191 premature deaths prevented, four calculated changes in life expectancy, six assessed life-years  
192 gained and one calculated disability-adjusted life years. Additionally, seven studies specified  
193 morbidity outcomes and 28 studies conducted an economic assessment, mainly using the value of a  
194 statistical life year (n=24), with some studies adding a cost of illness (n=5) or a social cost of carbon  
195 (n=2) assessment. Others based their assessment on external costs from the European Commission  
196 (n=2), the unit value of health outcome (n=1) or the cost of conserved energy (n=1).

197 Several framework for modelling exposure were used across included studies to: 1) spatialize air  
198 pollution concentrations based on emissions reduction using a single model or a model mixture  
199 (atmospheric-chemistry, energy system, integrated assessment with air quality module); 2) attribute  
200 health outcomes to changes in active transport in the population; 3) attribute health outcomes to  
201 changes in dietary patterns in the population.

202 Methods to quantify health impacts were more limited in number, with 44 studies using comparative  
203 risk assessment methods (CRA), 13 studies relying on lifetable approaches, and one employing  
204 microsimulations.<sup>53</sup>

205 **Confidence assessment**

206 According to our criteria adapted from Hess et al.<sup>11</sup>, general modelling methods were overall well  
207 conducted (Figure 5, criteria 1 to 6). The policies, scenarios and timeframes were well defined,  
208 whereas the most overlooked criterion was the evaluation of the equity impacts of policy adoption.  
209 Discussion of the adverse consequences of mitigation actions, sources of uncertainty and sensitivity  
210 analyses were limited. There were also very little data and code publicly available. Detailed results of  
211 the confidence assessment by study are available in Table S4.

212

213 **Figure 5. Confidence assessment of included studies per criterion adapted from Hess et al.<sup>11</sup>**

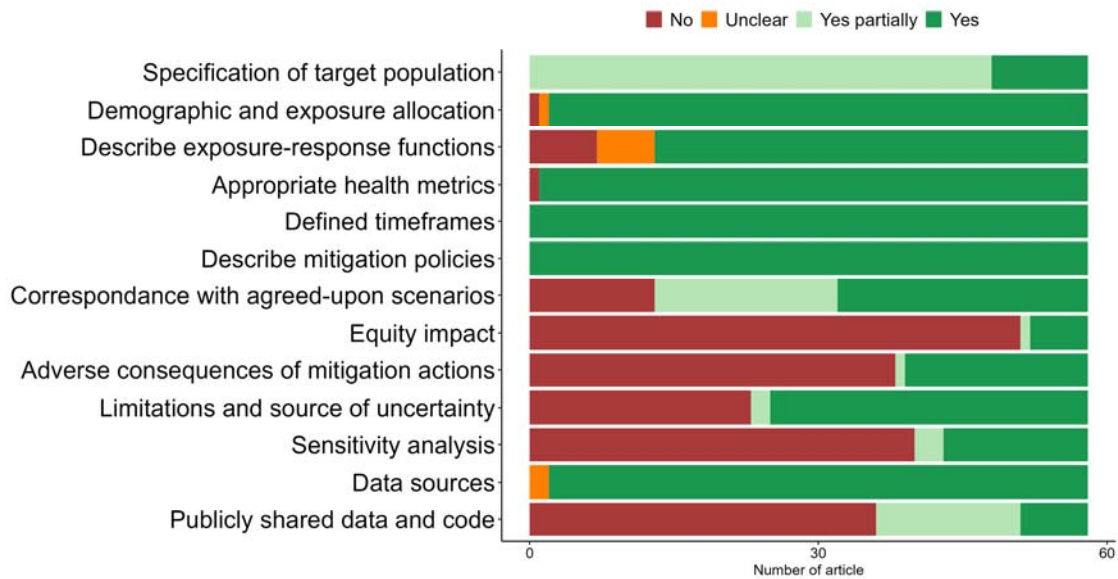

214

## 215 Synthesis of the evidence

### 216 Quantitative health impact

217 We were able to retrieve and scale the preventable mortality fraction of 96 scenarios across 45  
218 studies. Across these scenarios, two (from one study) reported detrimental health impacts (i.e.  
219 adverse effects on health) in the energy sector (-0.09% and -0.04% of mortality fraction).<sup>51</sup> All other  
220 scenarios (i.e. 94 over 96) yielded considerable reductions in all-cause mortality, with an inter-  
221 quartile range between 0.55% and 3.59%, and up to 18.74% (highest estimated impact),<sup>45</sup> with a  
222 median value of 1.48% (Figure 6A). The estimated health impacts seemed lower in studies using  
223 lifetables and higher when accounting for increasing GHG emissions in the baseline scenario (Figure 6  
224 B/C), a finding which holds true even when considering air pollution pathway only (Figure S2).  
225 Although very few studies assessed the impacts of diet and physical activity pathways, the benefits  
226 arising from changing their patterns have the potential to yield significant health benefits (Figure 6D).  
227 Modelling emissions from multiple or unique sectors may have provided as much health benefit  
228 compared with using whole economy models (Figure 6E). We did not identify any single common  
229 factor among the scenarios that yielded the greatest health benefits. When comparing the economic  
230 benefits arising from health impacts and the implementation costs of the policies (n=13), most  
231 studies (n=11) found net benefits and two found a partial compensation (or a net benefit depending  
232 on the country).

233

234 **Figure 6. Preventable mortality fraction (%) across net-zero scenarios. We depicted all scalable**  
235 **mortality fractions from our total sample (A) and stratified by health impact assessment methods**  
236 **(B), choice of the baseline scenario (C), type of co-benefit pathway (D) or sector of emission (E).**  
237 *Horizontal bar represents the median value of preventable mortality (%). CRA: Comparative risk*  
238 *assessment.*

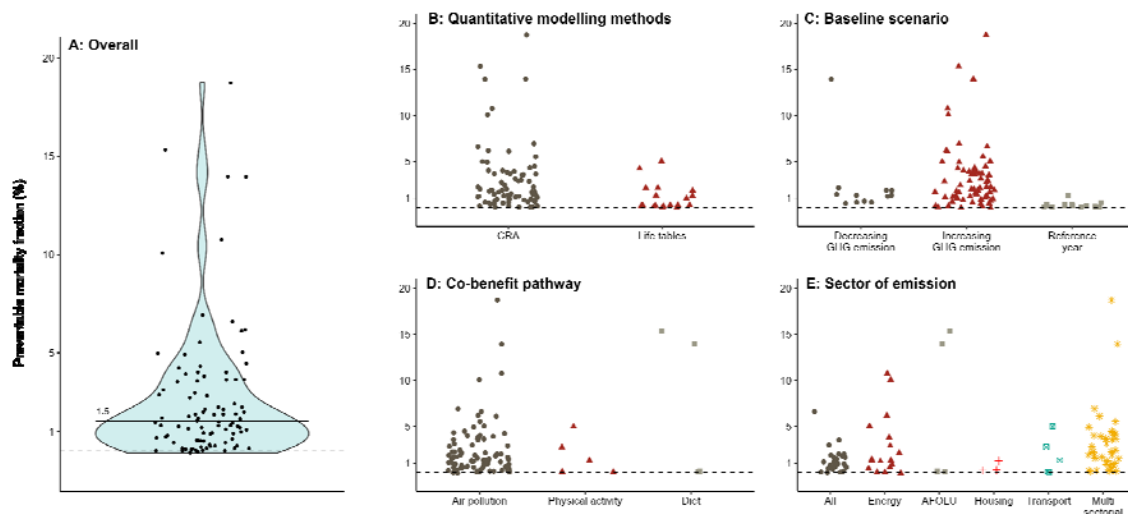

239

## 240 Health impact across emission sectors and pathways of co-benefits

241 Most studies focused only on air pollution in association with one or several emission sectors (Figures  
242 6D and S2), with a wide amplitude of health impacts, as for physical activity and diet pathways.

243 Regarding the most frequently studied air pollutants, fine particulate matter <2.5 $\mu$ m (PM<sub>2.5</sub>) and  
244 ozone (O<sub>3</sub>), the sectors associated with the largest health co-benefits were industry, household,  
245 energy, transport and agriculture.<sup>26,42,46,68</sup> Population density, the sectors of emissions and baseline  
246 levels represented important drivers of potential health benefits arising through better air  
247 quality.<sup>24,26,37,47,66</sup> Health co-benefits from decreasing air pollution arose mainly from reduced acute  
248 and chronic cardiovascular and respiratory tract diseases.<sup>31,32,48,61</sup>

249 Increased physical activity also generated substantial public health benefits, which were comparable  
250 to the gains expected by large scale health prevention interventions.<sup>52</sup> In many countries, attainment  
251 of net-zero emissions yielded larger co-benefits through dietary shifts, compared to air pollution  
252 reduction or active travel.<sup>5</sup> The pathway yielding the greatest health benefits depended on regional  
253 context and the number of mitigation actions modelled.<sup>5,6</sup>

## 254 Health impact across the typology of net-zero scenarios

255 Due to a higher potential for reducing air pollution, a scenario that implemented demand reduction  
256 policies provided greater health benefits than an energy decarbonization scenario.<sup>17</sup> Greater benefits  
257 were expected if the energy sector was based on renewable instead of carbon capture and storage  
258 technologies.<sup>31</sup> “Health in all policies” scenarios (electrification and clean renewable energy) yielded  
259 four times more health co-benefits than financial instrument (combustible renewable fuels).<sup>66</sup> A city-  
260 level study (Beijing) found that developing active travel and public transport yielded higher health co-  
261 benefits than the electrification of private vehicles (even without accounting for increased physical  
262 activity).<sup>57</sup> Different socio-economic projections, priorities given and levels of ambition yielded very  
263 different health impacts,<sup>19</sup> especially for physical activity and diet.<sup>6</sup>

## 264 Equity impact and regional disparities in net-zero scenarios

265 Very few studies explored the distribution of health impacts regarding socially and economically  
266 marginalized populations (n=6). In India, health benefits of net-zero emission scenarios were  
267 modelled to be greater for men, urban and high socio-demographic index population.<sup>54</sup> The  
268 implementation of integrated climate, air quality, and clean energy access interventions had a  
269 synergistic impact, avoiding millions of stunted children, particularly for the most disadvantaged  
270 children and geographic regions.<sup>53</sup>

271 Ambitious GHG reduction efforts in California provided substantial health co-benefits, especially for  
272 residents of disadvantaged communities.<sup>64</sup> In the US, the enhanced electrification of the transport  
273 sector was shown to benefit disadvantaged communities more effectively than building  
274 electrification.<sup>65</sup> Accounting for air pollution-related health impacts showed that climate policies  
275 have the potential to reduce inequality and increase welfare at several geographical scales, partly  
276 because the most disadvantaged communities were more exposed in some regions.<sup>16,67</sup> However,  
277 even if inequalities were reduced with air quality improvements, they would remain high as long as  
278 control measures do not target lower-income regions.<sup>20</sup>

279 Partially due to a high baseline exposure and population density, air pollution co-benefits were the  
280 greatest for China (Figure S3) and India.<sup>5,15–17,20–22</sup> In G20 countries, benefits were mainly attributable  
281 to PM<sub>2.5</sub> emission reduction.<sup>26</sup> Mitigation policies affecting air pollution emissions had substantial  
282 transboundary health impacts, with the transport sector being a major contributor to these benefits.  
283<sup>13,26</sup> Carbon trading based on historical mitigation rate and low-carbon investment transfer across

284 regions improved the efficiency of global mitigation actions in some contexts.<sup>14</sup> Disparities in health  
285 impacts were also influenced by population aging, which is expected to increase in the coming years.  
286 However, the health co-benefits arising from air pollution mitigation have the potential to offset the  
287 effects of population ageing, even for a rapidly ageing country such as China.<sup>41,43-45,59</sup>

## 288 DISCUSSION

### 289 Review findings

290 Studies assessing the health impact of scenarios aiming at net-zero emissions show public health co-  
291 benefits arising from a wide array of scenarios, emission sectors, and co-benefit pathways (Figure 4).  
292 98% of scenarios (94 out of 96) found favourable health impacts that depended on the scenario  
293 assumptions, co-benefits pathways and region of implementation. Half of scenarios yielded more  
294 than 1.5% of preventable mortality fraction. However, the preventable fraction cannot simply be  
295 extrapolated from one setting to another because of the heterogeneity in co-benefit pathways,  
296 demographic characteristics, modelling methods and assumptions. A large majority of studies that  
297 compared implementation costs with monetized health benefits (11 out of 13) reported that the  
298 costs of net-zero policies would be offset by the economic gains provided by health benefits.

299 The available evidence mostly focused on three major health pathways, namely dietary risks, air  
300 pollution and physical inactivity, that have been estimated to be responsible for respectively up to 7,  
301 8 and 4 million global deaths annually.<sup>12,69,70</sup> Similarly to improved dietary patterns, reduced  
302 exposure to air pollution would have the potential to yield very important health benefits, especially  
303 in high-density and polluted regions.<sup>5</sup> More comprehensive policies also targeting household air  
304 quality could yield larger health benefits in some regions.<sup>6</sup> Active transport policies also have a great  
305 potential where the lack of physical activity already induces a high health burden.<sup>5</sup>

306 Our review identified several sources of variability in the assessed impacts. In the reviewed studies,  
307 most health impacts were assessed either by CRA or lifetable approaches. CRA is a simpler approach  
308 but might overestimate health impacts because it completely averts a proportion of deaths. Lifetable  
309 approaches adopt a more realistic model of deaths over time, as they account for age-specific  
310 mortality in the population.<sup>71</sup> The assumptions regarding the baseline scenario, especially the  
311 evolution of GHG emissions, might affect the magnitude of predicted health outcomes (Figure 6C).

312 Explored scenarios and settings were also highly variable. Energy decarbonization based on various  
313 technologies received the highest attention, while many net-zero scenarios were not explicit in the  
314 transformations assumed to achieve net-zero. Despite their high mitigation potential and synergy  
315 with well-being, demand reduction strategies were often marginalized in climate policy and scenarios  
316 (Figure S1), with many studies failing to specify implementation mechanisms.<sup>4,72</sup> A majority of studies  
317 were performed in high-income regions (Figure S4) and only a few addressed health inequalities  
318 despite their relevance for public health and environmental justice.<sup>73</sup>

### 319 Implication of the results

320 Given the long residence time of some GHGs (especially CO<sub>2</sub>) in the atmosphere, accelerated and  
321 equitable mitigation actions have the potential to attain net-zero emissions only at mid- to long-  
322 term, depending on the emission sector (2030-35 for AFOLU and 2050 for the industry).<sup>3</sup> Conversely,  
323 these same actions have the potential to improve health and well-being in the near term<sup>2</sup> by  
324 improving cardio-vascular, respiratory and mental health outcomes associated with co-benefits  
325 pathways<sup>74,75</sup> particularly from air pollution, diet and physical activity.<sup>6</sup>

326 Another important feature of health co-benefits of climate mitigation policies highlighted by this  
327 review is their largely unconditional nature. From a climate perspective, mitigation actions require to  
328 be implemented in a large part of countries and regions to allow for a control of global warming. This  
329 nature of climate benefits, which are conditional to global coordinated actions, may be prone to the

330 free-rider problem, where actors do not actively contribute to efforts while expecting to take  
331 advantage from collective benefits. Conversely, most of the studies projecting net-zero scenarios  
332 reported important health co-benefits while making no specific assumption regarding global  
333 coordinated climate actions. In other words, health co-benefits of mitigation policies are largely  
334 unconditioned to climate action from other countries or regions, and therefore likely less affected by  
335 the free-rider problem. For some pathways (such as physical activity and diet), the health benefits  
336 are restricted to the territories that implement the policies. For air quality, the magnitude of health  
337 benefits partially depends on the policies implemented by neighbouring countries,<sup>13,26</sup> but out of the  
338 35 studies assessing air pollution pathway at a national or sub-national scale, 34 revealed that net-  
339 zero policies would bring significant local air quality benefits, independently of the actions taken in  
340 neighbouring countries.

341 Relying on monetary valuation of health impacts, studies have shown that health co-benefits of  
342 climate policies have the potential to outweigh the costs of net-zero policies, depending on the  
343 region, with India and China showing the largest benefits. The Intergovernmental Panel on Climate  
344 Change (IPCC) also reports that the global benefits of climate policies (not accounting for health)  
345 exceed the cost of mitigation.<sup>2</sup> Economic impact assessments anticipate other benefits directly or  
346 indirectly affecting human health, such as the net creation of millions of jobs, fewer work loss days  
347 and tens of billions of dollars for labour productivity, crop yield increase, reduced hospital  
348 expenditures<sup>13,25,55,67</sup> and a more resilient energy system.<sup>18</sup>

## 349 **Research gaps**

350 The high heterogeneity of retrieved studies regarding scenarios, emission sectors, co-benefit  
351 pathways and modelling approaches prevented us from drawing conclusions about a clear ranking of  
352 co-benefits pathways in terms of potential health impact. In addition, our comparison of health  
353 impacts does not account for factors that could potentially lead to differences across studies,  
354 particularly due to variations in locations and study populations.

355 While our review highlighted important health and economic benefits, numerous health impacts  
356 remain underestimated. For instance, modal shift to active mode of transportation could provide  
357 additional health co-benefits by reducing noise exposure.<sup>76</sup> Included HIAs also fail to address mental  
358 health impacts, despite evidences suggesting an association between air quality and physical activity  
359 with mental health.<sup>74,77</sup> Adaptation measures not accounted for, such as urban green space, also  
360 have the potential to yield substantial health benefits.<sup>78</sup> Incorporating household pollution is  
361 essential for assessing potentially detrimental health impacts associated with poorly ventilated  
362 housing.<sup>63</sup> Lastly, only one study considered the impact of prenatal environmental exposures.<sup>53</sup>

363 Uncertainties in health impact quantification also result from difficulties in considering multiple  
364 parameters such as specific exposure-response functions (across age, sex or social factors) or the  
365 specific distribution of exposures among the studied population. For each mitigation action, there  
366 are also potential positive synergistic effects that can be hard to account for in quantitative  
367 assessments, such as reduced air pollution emissions along with changes in active transport and  
368 dietary patterns. Conversely, extreme climate hazards can restrain cycling behaviours, and health  
369 impacts from combined air pollution and heat exposure are exacerbated.<sup>79</sup> Prospective assessments  
370 also assume a consistent healthcare system efficiency across all scenarios while higher air pollution  
371 and temperature are associated with increased hospital admissions.<sup>80</sup>

372 Many of the studies and scenarios are from high and upper-middle-income regions, where the  
373 mitigation efforts are expected to be the greatest, and therefore related societal changes are



374 expected to be important. Whether the magnitude of health co-benefits would be of the same scale  
375 in low-income countries remains unclear and will greatly depend on levels of fossil fuel related air  
376 pollution, dietary patterns and levels of physical activity.<sup>69</sup> For instance, evidence suggests that air  
377 pollution reduction (and notably household pollution from cooking stoves) could have a high health  
378 co-benefit potential in India.<sup>53,54</sup> Conversely, one study showed that only modest benefits may be  
379 expected in Nigeria from sustainable diet policies.<sup>5</sup>

380 Evidence on the feasibility and acceptability of implementing assessed actions is limited. However,  
381 known effective interventions include dietary modifications through education, persuasion, and  
382 environmental restructuring.<sup>81</sup> In the transport sector, active mobility policies are most effective  
383 when integrating safe walking and cycling infrastructure with strong public transport support and  
384 educational programs.<sup>82</sup>

385 Finally, we did not investigate grey literature due to methodological issues, and may thus, for  
386 instance, have missed assessments published as reports.

### 387 **Perspectives and future directions**

388 Several recommendations for future HIA of net-zero scenarios may be inferred from our review.

389 First, studies should clearly state and justify which mitigation lever(s) are implied by the policy  
390 assessed to better estimate the impacts of diverse type of net-zero emission policies.<sup>17,57,62</sup> While  
391 they gathered a relatively low research interest, demand-side mitigation policies are essential as they  
392 have the potential to induce fundamental lifestyle changes that would support the implementation  
393 of sustainable and healthy actions.<sup>72</sup> Policies and actions must extend beyond technological  
394 efficiency improvements to address unsustainable systems that drive high energy and material  
395 demands, leading to elevated emissions while neglecting healthy environments.<sup>4</sup> This is particularly  
396 evident in the transport sector, where decarbonization policies exclusively focused on technological  
397 improvements could exacerbate physical inactivity in the population.<sup>83</sup>

398 As aging populations can have a significant impact on estimates,<sup>45</sup> HIAs should prefer lifetable  
399 approaches to estimate more accurately health impacts over time while baseline scenarios should  
400 include a projection of the studied population to compare the impacts based on the same population  
401 pyramid. Prospective HIAs of net-zero scenarios should carefully use adapted vulnerability indicators  
402 to assess health impacts when possible and otherwise address inequality impacts qualitatively.<sup>84</sup>  
403 Assessment of energy decarbonization policies should address energy poverty which has  
404 environmental justice implications.<sup>85</sup>

405 The lack of code and data sharing by most of the studies presents a significant barrier to advancing  
406 health impact monitoring associated with net-zero scenarios, such as the development of living  
407 systematic reviews. Accelerating research and monitoring of health impacts is essential to provide  
408 evidence-based and timely feedback to decision-makers.

409 Finally, our review highlights a need for a standardized framework to assess the health impacts of  
410 net-zero emission scenarios. This framework should make use of already existing scalable tools and  
411 methods to compare prospective scenarios regarding the evolution of specific exposures, to  
412 incorporate a relevant baseline scenario and attribute health impacts across populations over time.

## 413 **Conclusion**

414 Our synthesis of the available evidence suggests that achieving net-zero emissions across different  
415 sectors would generate large health co-benefits and prevent a considerable fraction of mortality.  
416 Therefore, each further delay in implementing transformative changes toward net-zero society may  
417 not only increase risks induced by climate change, but also represent a missed opportunity to  
418 improve human health. Especially because health co-benefits of climate mitigation policies are  
419 expected to manifest in the short term, are not conditioned to global coordinated climate action, and  
420 may outweigh the costs of mitigation policies, highlighting these health co-benefits make a strong  
421 case for driving impactful mitigation action.

## 422 **DECLARATIONS**

### 423 **Availability of data and materials**

424 All codes, analysis, extraction and quality grid are available in the following GitHub repository:

425 [https://github.com/LeoMoutet/revue\\_syst](https://github.com/LeoMoutet/revue_syst).

### 426 **Competing interests**

427 The authors declare that they have no competing interests.

### 428 **Funding**

429 This project did not receive any specific funding.

### 430 **Authors' contributions**

431 LM, LT and KJ designed the scope of the review, performed the study selection and wrote the original  
432 draft of the article. LM and PB extracted the data from included studies. LM performed the  
433 confidence assessment. RG and JM provided inputs regarding health impact assessment frameworks  
434 and health co-benefits. AH and RS contributed to the interpretation of the results. All authors read  
435 and approved the final manuscript.

### 436 **Acknowledgements**

437 The authors would like to thank Audrey De Nazelle for helpful discussions regarding review findings.

### 438 **Review protocol**

439 No review protocol was published prior to this study.

## 440 REFERENCES

- 441 1 UNFCCC (United nations Framework Convention on Climate Change ), 21st session. Paris  
442 Agreement. 2015. [https://unfccc.int/sites/default/files/english\\_paris\\_agreement.pdf](https://unfccc.int/sites/default/files/english_paris_agreement.pdf).
- 443 2 Calvin K, Dasgupta D, Krinner G, *et al.* IPCC, 2023: Climate Change 2023: Synthesis Report.  
444 Contribution of Working Groups I, II and III to the Sixth Assessment Report of the  
445 Intergovernmental Panel on Climate Change [Core Writing Team, H. Lee and J. Romero (eds.)].  
446 IPCC, Geneva, Switzerland. Intergovernmental Panel on Climate Change (IPCC), 2023  
447 DOI:10.59327/IPCC/AR6-9789291691647.
- 448 3 Intergovernmental Panel On Climate Change (Ippcc), editor. Climate Change 2022 - Mitigation of  
449 Climate Change: Working Group III Contribution to the Sixth Assessment Report of the  
450 Intergovernmental Panel on Climate Change, 1st edn. Cambridge University Press, 2023  
451 DOI:10.1017/9781009157926.
- 452 4 Whitmee S, Green R, Belesova K, *et al.* Pathways to a healthy net-zero future: report of the Lancet  
453 Pathfinder Commission. *The Lancet* 2024; **403**: 67–110.
- 454 5 Hamilton I, Kennard H, McGushin A, *et al.* The public health implications of the Paris Agreement: a  
455 modelling study. *Lancet Planet Health* 2021; **5**: e74–83.
- 456 6 Milner J, Turner G, Ibbetson A, *et al.* Impact on mortality of pathways to net zero greenhouse gas  
457 emissions in England and Wales: a multisectoral modelling study. *Lancet Planet Health* 2023; **7**:  
458 e128–36.
- 459 7 Landrigan PJ, Britt M, Fisher S, *et al.* Assessing the Human Health Benefits of Climate Mitigation,  
460 Pollution Prevention, and Biodiversity Preservation. *Ann Glob Health* 2024; **90**: 1.
- 461 8 Poortinga W, Whitmarsh L, Steentjes K, Gray E, Thompson S, Brisley R. Factors and framing effects  
462 in support for net zero policies in the United Kingdom. *Front Psychol* 2023; **14**: 1287188.
- 463 9 Page MJ, McKenzie JE, Bossuyt PM, *et al.* The PRISMA 2020 statement: an updated guideline for  
464 reporting systematic reviews. *BMJ* 2021; : n71.
- 465 10 Veritas Health Innovation, Melbourne, Australia. Covidence systematic review software.  
466 [www.covidence.org](http://www.covidence.org).
- 467 11 Hess JJ, Ranadive N, Boyer C, *et al.* Guidelines for Modeling and Reporting Health Effects of  
468 Climate Change Mitigation Actions. *Environ Health Perspect* 2020; **128**: 115001.
- 469 12 Institute for Health Metrics and Evaluation (IHME). Global Burden of Disease Collaborative  
470 Network (GBD 2021). 2024. <https://vizhub.healthdata.org/gbd-results/> (accessed March 28,  
471 2024).
- 472 13 Wang Y, Xie M, Wu Y, *et al.* Ozone-related Co-benefits of China's Climate mitigation Policy. *Resour*  
473 *Conserv Recycl* 2022; **182**. DOI:10.1016/j.resconrec.2022.106288.
- 474 14 Wang H, Chen W, Rauner S, Bertram C, Luderer G, Kriegler E. The Double Dividend of International  
475 Cooperation for Climate Mitigation Cost Effectiveness and Public Health Cobenefits. *Environ Sci*  
476 *Technol* 2023; **57**: 4061–70.
- 477 15 Rauner S, Hilaire J, Klein D, Strefler J, Luderer G. Air quality co-benefits of ratcheting up the NDCs.  
478 *Clim Change* 2020; **163**: 1481–500.

- 479 16 Reis LA, Drouet L, Tavoni M. Internalising health-economic impacts of air pollution into climate  
480 policy: a global modelling study. *Lancet Planet Health* 2022; **6**: e40–8.
- 481 17 Sampedro J, Smith SJ, Arto I, *et al.* Health co-benefits and mitigation costs as per the Paris  
482 Agreement under different technological pathways for energy supply. *Environ Int* 2020; **136**:  
483 105513.
- 484 18 McCollum DL, Krey V, Riahi K, *et al.* Climate policies can help resolve energy security and air  
485 pollution challenges. *Clim Change* 2013; **119**: 479–94.
- 486 19 Polonik P, Ricke K, Burney J. Paris Agreement’s Ambiguity About Aerosols Drives Uncertain Health  
487 and Climate Outcomes. *Earths Future* 2021; **9**. DOI:10.1029/2020EF001787.
- 488 20 Reddington CL, Turnock ST, Conibear L, *et al.* Inequalities in Air Pollution Exposure and  
489 Attributable Mortality in a Low Carbon Future. *Earths Future* 2023; **11**: e2023EF003697.
- 490 21 Sampedro J, Cui RY, McJeon H, *et al.* Quantifying the reductions in mortality from air-pollution by  
491 cancelling new coal power plants. *Energy Clim Change* 2021; **2**. DOI:10.1016/j.egycc.2020.100023.
- 492 22 Vandyck T, Keramidas K, Kitous A, *et al.* Air quality co-benefits for human health and agriculture  
493 counterbalance costs to meet Paris Agreement pledges. *Nat Commun* 2018; **9**: 4939.
- 494 23 Markandya A, Sampedro J, Smith SJ, *et al.* Health co-benefits from air pollution and mitigation  
495 costs of the Paris Agreement: a modelling study. *Lancet Planet Health* 2018; **2**: e126–33.
- 496 24 Jacobson MZ, Delucchi MA, Bauer ZAF, *et al.* 100% Clean and Renewable Wind, Water, and  
497 Sunlight All-Sector Energy Roadmaps for 139 Countries of the World. *Joule* 2017; **1**: 108–21.
- 498 25 Nawaz MO, Henze DK, Anenberg SC, Braun C, Miller J, Pronk E. A Source Apportionment and  
499 Emission Scenario Assessment of PM 2.5 and O3 related Health Impacts in G20 Countries.  
500 *GeoHealth* 2023; **7**: e2022GH000713.
- 501 26 Schmid D, Korkmaz P, Blesl M, Fahl U, Friedrich R. Analyzing transformation pathways to a  
502 sustainable European energy system—Internalization of health damage costs caused by air  
503 pollution. *Energy Strategy Rev* 2019; **26**. DOI:10.1016/j.esr.2019.100417.
- 504 27 Rafaj P, Kiesewetter G, Krey V, *et al.* Air quality and health implications of 1.5 °C-2 °C climate  
505 pathways under considerations of ageing population: A multi-model scenario analysis. *Environ Res*  
506 *Lett* 2021; **16**. DOI:10.1088/1748-9326/abdf0b.
- 507 28 Rafaj P, Kiesewetter G, Gül T, *et al.* Outlook for clean air in the context of sustainable development  
508 goals. *Glob Environ Change* 2018; **53**: 1–11.
- 509 29 Rafaj P, Schöpp W, Russ P, Heyes C, Amann M. Co-benefits of post-2012 global climate mitigation  
510 policies. *Mitig Adapt Strateg Glob Change* 2013; **18**: 801–24.
- 511 30 Chen H, Wang Z, Xu S, Zhao Y, Cheng Q, Zhang B. Energy demand, emission reduction and health  
512 co-benefits evaluated in transitional China in a 2 °C warming world. *J Clean Prod* 2020; **264**.  
513 DOI:10.1016/j.jclepro.2020.121773.
- 514 31 Cai W, Hui J, Wang C, *et al.* The Lancet Countdown on PM 2.5 pollution-related health impacts of  
515 China’s projected carbon dioxide mitigation in the electric power generation sector under the  
516 Paris Agreement: a modelling study. *Lancet Planet Health* 2018; **2**: e151–61.

- 517 32 Ma T, Zhang S, Xiao Y, *et al.* Costs and health benefits of the rural energy transition to carbon  
518 neutrality in China. *Nat Commun* 2023; **14**: 6101.
- 519 33 Tang R, Zhao J, Liu Y, *et al.* Air quality and health co-benefits of China's carbon dioxide emissions  
520 peaking before 2030. *Nat Commun* 2022; **13**: 1008.
- 521 34 Yang X, Xi X, Lin W, Guo S. Effect of China's energy conservation efforts on reducing health  
522 damage. *Energy Procedia* 2019; **158**: 3768–73.
- 523 35 Luo Q, Garcia-Menendez F, Lin J, He G, Johnson JX. Accelerating China's power sector  
524 decarbonization can save lives: integrating public health goals into power sector planning  
525 decisions. *Environ Res Lett* 2023; **18**: 104023.
- 526 36 Shen J, Cai W, Chen X, *et al.* Synergies of carbon neutrality, air pollution control, and health  
527 improvement — a case study of China energy interconnection scenario. *Glob Energy Interconnect*  
528 2022; **5**: 531–42.
- 529 37 Xing J, Lu X, Wang S, *et al.* The quest for improved air quality may push China to continue its CO<sub>2</sub>  
530 reduction beyond the Paris Commitment. *Proc Natl Acad Sci* 2020; **117**: 29535–42.
- 531 38 Qu C, Yang X, Zhang D, Zhang X. ESTIMATING HEALTH CO-BENEFITS OF CLIMATE POLICIES IN  
532 CHINA: AN APPLICATION OF THE REGIONAL EMISSIONS-AIR QUALITY-CLIMATE-HEALTH (REACH)  
533 FRAMEWORK. *Clim Change Econ* 2020; **11**: 2041004.
- 534 39 Zhang S, An K, Li J, *et al.* Incorporating health co-benefits into technology pathways to achieve  
535 China's 2060 carbon neutrality goal: a modelling study. *Lancet Planet Health* 2021; **5**: e808–17.
- 536 40 Cheng J, Tong D, Liu Y, *et al.* A synergistic approach to air pollution control and carbon neutrality  
537 in China can avoid millions of premature deaths annually by 2060. *One Earth* 2023; **6**: 978–89.
- 538 41 Conibear L, Reddington CL, Silver BJ, *et al.* The contribution of emission sources to the future air  
539 pollution disease burden in China. *Environ Res Lett* 2022; **17**: 064027.
- 540 42 Liu Y, Tong D, Cheng J, *et al.* Role of climate goals and clean-air policies on reducing future air  
541 pollution deaths in China: a modelling study. *Lancet Planet Health* 2022; **6**: e92–9.
- 542 43 Li N, Chen W, Rafaj P, *et al.* Air Quality Improvement Co-benefits of Low-Carbon Pathways toward  
543 Well Below the 2 °C Climate Target in China. *Environ Sci Technol* 2019; **53**: 5576–84.
- 544 44 Wang Y, Liao H, Chen H, Chen L. Future Projection of Mortality From Exposure to PM<sub>2.5</sub> and O<sub>3</sub>  
545 Under the Carbon Neutral Pathway: Roles of Changing Emissions and Population Aging. *Geophys*  
546 *Res Lett* 2023; **50**: e2023GL104838.
- 547 45 Phillips D. Ambient Air Quality Synergies with a 2050 Carbon Neutrality Pathway in South Korea.  
548 *Climate* 2021; **10**: 1.
- 549 46 Hata H, Inoue K, Yoshikado H, Genchi Y, Tsunemi K. Impact of introducing net-zero carbon  
550 strategies on tropospheric ozone (O<sub>3</sub>) and fine particulate matter (PM<sub>2.5</sub>) concentrations in  
551 Japanese region in 2050. *Sci Total Environ* 2023; **891**: 164442.
- 552 47 Zyśk J, Wyrwa A, Suwała W, Pluta M, Olkusi T, Raczyński M. The impact of decarbonization  
553 scenarios on air quality and human health in Poland-analysis of scenarios up to 2050. *Atmosphere*  
554 2020; **11**. DOI:10.3390/atmos11111222.

- 555 48 Zyśk J, Wyrwa A, Pluta M, Olkuski T, Suwała W, Raczyński M. The health impact and external cost  
556 of electricity production. *Energies* 2021; **14**. DOI:10.3390/en14248263.
- 557 49 Williams ML, Lott MC, Kitwiroon N, *et al.* The Lancet Countdown on health benefits from the UK  
558 Climate Change Act: a modelling study for Great Britain. *Lancet Planet Health* 2018; **2**: e202–13.
- 559 50 Barban P, De Nazelle A, Chatelin S, Quirion P, Jean K. Assessing the Health Benefits of Physical  
560 Activity Due to Active Commuting in a French Energy Transition Scenario. *Int J Public Health* 2022;  
561 **67**: 1605012.
- 562 51 Dimitrova A, Marois G, Kiesewetter G, *et al.* Projecting the impact of air pollution on child stunting  
563 in India—synergies and trade-offs between climate change mitigation, ambient air quality control,  
564 and clean cooking access. *Environ Res Lett* 2022; **17**. DOI:10.1088/1748-9326/ac8e89.
- 565 52 Dimitrova A, Marois G, Kiesewetter G, K C S, Rafaj P, Tonne C. Health impacts of fine particles  
566 under climate change mitigation, air quality control, and demographic change in India. *Environ Res*  
567 *Lett* 2021; **16**. DOI:10.1088/1748-9326/abe5d5.
- 568 53 Shindell D, Ru M, Zhang Y, *et al.* Temporal and spatial distribution of health, labor, and crop  
569 benefits of climate change mitigation in the United States. *Proc Natl Acad Sci U S A* 2021; **118**.  
570 DOI:10.1073/pnas.2104061118.
- 571 54 Xie W, Guo W, Shao W, Li F, Tang Z. Environmental and health co-benefits of coal regulation under  
572 the carbon neutral target: A case study in Anhui province, China. *Sustain Switz* 2021; **13**.  
573 DOI:10.3390/su13116498.
- 574 55 Lu C, Adger WN, Morrissey K, *et al.* Scenarios of demographic distributional aspects of health co-  
575 benefits from decarbonising urban transport. *Lancet Planet Health* 2022; **6**: e461–74.
- 576 56 Lin Z, Wang P, Ren S, Zhao D. Comprehensive impact assessment of carbon neutral pathways and  
577 air pollution control policies in Shaanxi Province of China. *Resour Conserv Recycl Adv* 2023; **18**.  
578 DOI:10.1016/j.rcradv.2023.200143.
- 579 57 Ma X, Zhang B, Duan H, *et al.* Estimating future PM2.5-attributed acute myocardial infarction  
580 incident cases under climate mitigation and population change scenarios in Shandong Province,  
581 China. *Ecotoxicol Environ Saf* 2023; **256**: 114893.
- 582 58 Zhang S, Wu Y, Liu X, *et al.* Co-benefits of deep carbon reduction on air quality and health  
583 improvement in Sichuan Province of China. *Environ Res Lett* 2021; **16**: 095011.
- 584 59 Creutzig F, Mühlhoff R, Römer J. Decarbonizing urban transport in European cities: four cases  
585 show possibly high co-benefits. *Environ Res Lett* 2012; **7**: 044042.
- 586 60 Shrubsole C, Das P, Milner J, *et al.* A tale of two cities: Comparison of impacts on CO2 emissions,  
587 the indoor environment and health of home energy efficiency strategies in London and Milton  
588 Keynes. *Atmos Environ* 2015; **120**: 100–8.
- 589 61 Wang T, Jiang Z, Zhao B, *et al.* Health co-benefits of achieving sustainable net-zero greenhouse gas  
590 emissions in California. *Nat Sustain* 2020; **3**: 597–605.
- 591 62 Zhu S, Mac Kinnon M, Carlos-Carlos A, Davis SJ, Samuelsen S. Decarbonization will lead to more  
592 equitable air quality in California. *Nat Commun* 2022; **13**: 5738.

- 593 63 Zhao B, Wang T, Jiang Z, *et al.* Air Quality and Health Cobenefits of Different Deep Decarbonization  
594 Pathways in California. *Environ Sci Technol* 2019; **53**: 7163–71.
- 595 64 Ortiz LE, Stiles R, Whitaker S, *et al.* Public health benefits of zero-emission electric power  
596 generation in Virginia. *Heliyon* 2023; **9**: e20198.
- 597 65 Nawaz MO, Henze DK, Huneus NJ, *et al.* Sources of Air Pollution Health Impacts and Co-Benefits  
598 of Carbon Neutrality in Santiago, Chile. *J Geophys Res Atmospheres* 2023; **128**: e2023JD038808.
- 599 66 Lelieveld J, Haines A, Burnett R, *et al.* Air pollution deaths attributable to fossil fuels: observational  
600 and modelling study. *BMJ* 2023; : e077784.
- 601 67 Katzmarzyk PT, Friedenreich C, Shiroma EJ, Lee I-M. Physical inactivity and non-communicable  
602 disease burden in low-income, middle-income and high-income countries. *Br J Sports Med* 2021; :  
603 bjsports-2020-103640.
- 604 68 Mueller N, Anderle R, Brachowicz N, *et al.* Model Choice for Quantitative Health Impact  
605 Assessment and Modelling: An Expert Consultation and Narrative Literature Review. *Int J Health  
606 Policy Manag* 2023; : 1.
- 607 69 Niamir L, Creutzig F. Demand-side solutions to climate change mitigation consistent with high  
608 levels of wellbeing. 2020; published online Dec 21. DOI:10.5281/ZENODO.5163965.
- 609 70 Spurlock CA, Elmallah S, Reames TG. Equitable deep decarbonization: A framework to facilitate  
610 energy justice-based multidisciplinary modeling. *Energy Res Soc Sci* 2022; **92**.  
611 DOI:10.1016/j.erss.2022.102808.
- 612 71 Herbert C, Meixner F, Wiebking C, Gilg V. Regular Physical Activity, Short-Term Exercise, Mental  
613 Health, and Well-Being Among University Students: The Results of an Online and a Laboratory  
614 Study. *Front Psychol* 2020; **11**: 509.
- 615 72 Haines A, McMichael AJ, Smith KR, *et al.* Public health benefits of strategies to reduce  
616 greenhouse-gas emissions: overview and implications for policy makers. *The Lancet* 2009; **374**:  
617 2104–14.
- 618 73 European Environment Agency. Environmental noise in Europe, 2020. LU: Publications Office,  
619 2020 <https://data.europa.eu/doi/10.2800/686249> (accessed June 14, 2024).
- 620 74 Braithwaite I, Zhang S, Kirkbride JB, Osborn DPJ, Hayes JF. Air Pollution (Particulate Matter)  
621 Exposure and Associations with Depression, Anxiety, Bipolar, Psychosis and Suicide Risk: A  
622 Systematic Review and Meta-Analysis. *Environ Health Perspect* 2019; **127**: 126002.
- 623 75 Barboza EP, Cirach M, Khomenko S, *et al.* Green space and mortality in European cities: a health  
624 impact assessment study. *Lancet Planet Health* 2021; **5**: e718–30.
- 625 76 Anenberg SC, Haines S, Wang E, Nassikas N, Kinney PL. Synergistic health effects of air pollution,  
626 temperature, and pollen exposure: a systematic review of epidemiological evidence. *Environ  
627 Health Glob Access Sci Source* 2020; **19**: 130.
- 628 77 Qiu X, Danesh-Yazdi M, Wei Y, *et al.* Associations of short-term exposure to air pollution and  
629 increased ambient temperature with psychiatric hospital admissions in older adults in the USA: a  
630 case–crossover study. *Lancet Planet Health* 2022; **6**: e331–41.



- 631 78 Wadi NM, Cheikh K, Keung YW, Green R. Investigating intervention components and their  
632 effectiveness in promoting environmentally sustainable diets: a systematic review. *Lancet Planet*  
633 *Health* 2024; **8**: e410–22.
- 634 79 Zukowska J, Gobis A, Krajewski P, *et al.* Which transport policies increase physical activity of the  
635 whole of society? A systematic review. *J Transp Health* 2022; **27**: 101488.
- 636 80 Moutet L, Bigo A, Quirion P, Temime L, Jean K. Different pathways toward net-zero emissions  
637 imply diverging health impacts: a health impact assessment study for France. *Environ Res Health*  
638 2024; **2**: 035005.
- 639 81 Robinson S, Roberts JT, Weikmans R, Falzon D. Vulnerability-based allocations in loss and damage  
640 finance. *Nat Clim Change* 2023; **13**: 1055–62.
- 641 82 Levenda AM, Behrsin I, Disano F. Renewable energy for whom? A global systematic review of the  
642 environmental justice implications of renewable energy technologies. *Energy Res Soc Sci* 2021; **71**.  
643 DOI:10.1016/j.erss.2020.101837.
